# Supplementary material
Source: Springer Nature journal article supplement (https://www.springermedizin.de/resource/supplementary/12903_2014_435_MOESM3_ESM.pdf/9516682)

a)

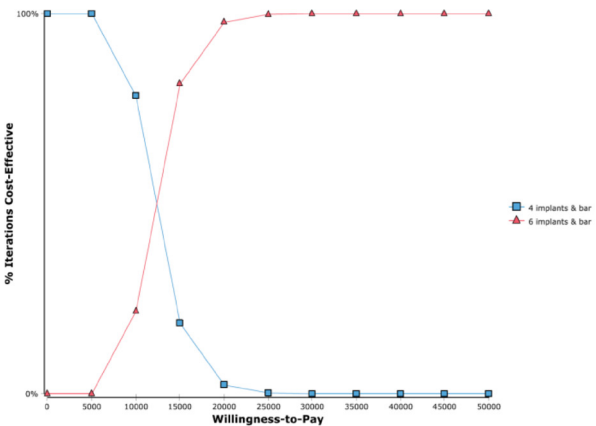

b)

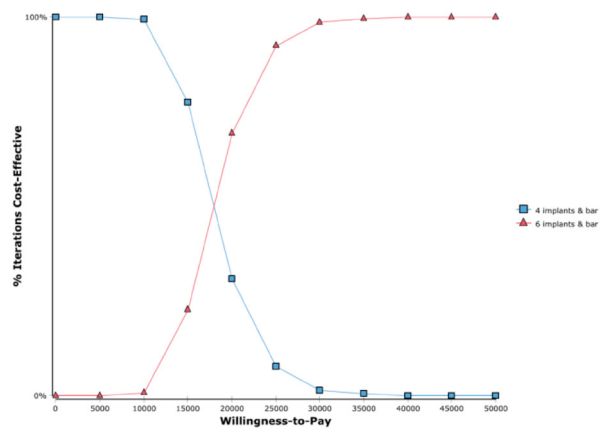

c)

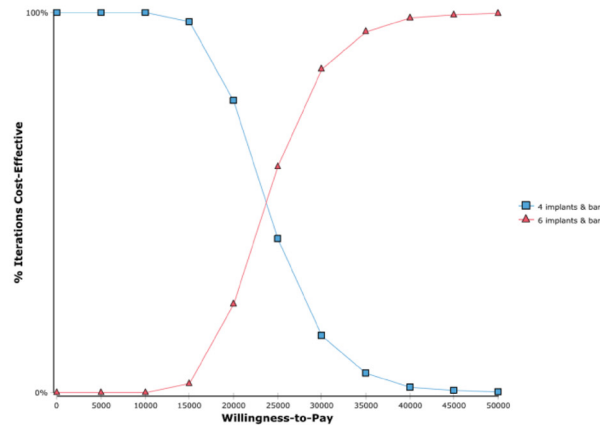

Supplement: MOESM3 [file 9516682]
